# Supplementary figures and images for: A turn-on fluorescein spirolactam derivative as a high selective fluorescence probe for detection of silver ion(i) in water
Source: Royal Society of Chemistry journal article supplement (doi:10.1039/c3ay41852a), 2013-12-10

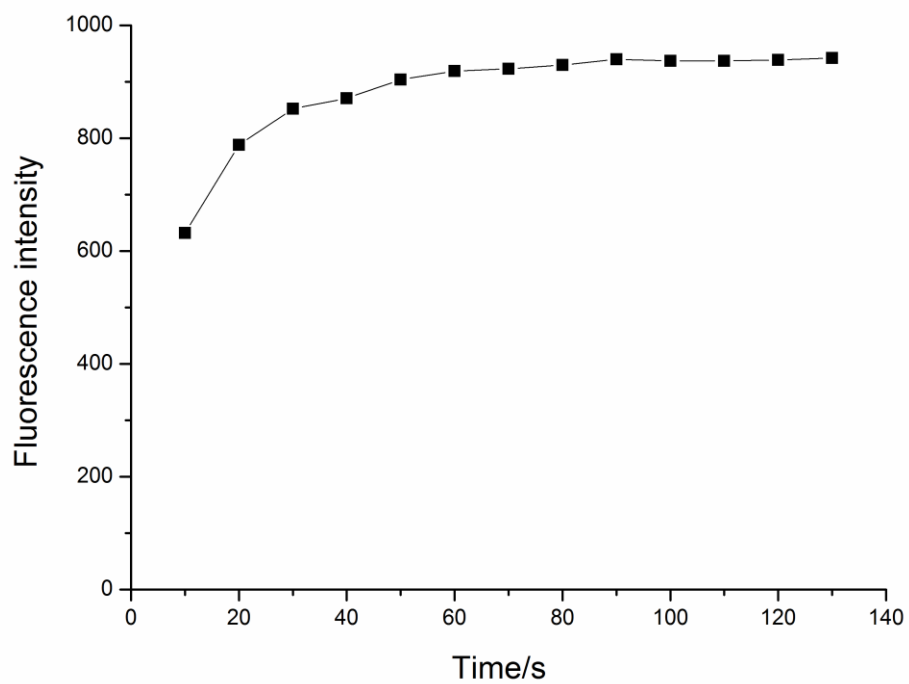

Fig.S1 Response of fluorescence intensity of HTMIX-Ag<sup>+</sup> probe to time

Supplement: c3ay41852a.pdf [file c3ay41852a.pdf]
